# Supplementary material
Source: PubMed Central journal article supplement (PMC3039694)
Supplement: NIHMS261982-supplement-Supp1.pdf [file NIHMS261982-supplement-Supp1.pdf]

**Supplementary Table 1. Human post mortem brain samples.**

| Case      | Diagnosis                         | Age | PMD  |
|-----------|-----------------------------------|-----|------|
| Control 1 | -                                 | 83  | 5    |
| Control 2 | -                                 | 92  | 19   |
| Control 3 | -                                 | 79  | 10   |
| Control 4 | -                                 | 93  | 13   |
| Control 5 | -                                 | 81  | 20   |
| Patient 1 | PD, Limbic LB                     | 81  | 8.75 |
| Patient 2 | PD, Neocortical LB                | 80  | 19   |
| Patient 3 | PD                                | 84  | 17.5 |
| Patient 4 | PD, Limbic LB                     | 83  | 14   |
| Patient 5 | PD, DLB                           | 77  | 5    |
| Patient 6 | PD, Neocortical LB                | 84  | 13   |
| Patient 7 | PD                                | 88  | 19.5 |
| Patient 8 | PD                                | 73  | 6    |
| Patient 9 | PD with dementia, Neocortical LBD | 84  | 5    |

Table S1. Diagnosis, post mortem delay (PMD; hours) and age (years) of subjects that were used in this study. PD – Parkinson’s disease; LB – Lewy body; DLB – Diffuse Lewy body; LBD – Lewy body disease.

**Supplemental Figure 1.** (a) Schematic representation of the parkin GST-fusion proteins. Ubiquitin like (UBL), unique parkin (UPD), RING1, IBR, RING2 domains and tyrosines (Y) are indicated. The position of Y143 is located in between the UBL and UPD region and is represented by an arrow in the figure. (b) Schematic representation of the c-Abl GST-fusion proteins. SH3, SH2, tyrosine kinases (TK), DNA-binding and actin domains are indicated. (c) Schematic representation of myc-tagged deletion mutants of parkin. The position of Y143 is located in between the UBL and UPD region and is represented by an arrow in the figure. (d) Schematic representation of c-Abl truncations.

**Supplemental Figure 2.** Primary midbrain neuronal cultures grown on polylysine-coated chambered slides were exposed to 100 nM MPP<sup>+</sup> for 24 h in the presence or absence of STI-571 (2.5  $\mu$ M for 6h prior to MPP<sup>+</sup> treatment). Cells were fixed and stained with anti-TH antibodies. The micrograph is representative of 3 independent experiments. The densitometric analysis represents mean  $\pm$  SEM from these experiments. \* $p$ <0.05 for difference from Control group. \*\* $p$ <0.05 for difference from MPTP group.

**Supplemental Figure 3.** Primary midbrain neuronal cultures and astrocytes were exposed to 100 nM MPP<sup>+</sup> for 24 h. Whole cell lysates 1) 20  $\mu$ g neuronal lysate; 2) 10  $\mu$ g neuronal lysate; 3) 5  $\mu$ g neuronal lysate; and 4) 20  $\mu$ g astrocyte lysate were immunoblotted either with anti-GFAP or anti-p-Abl antibodies.

**List of Antibodies and Recombinant Proteins:**

Anti-pTyr, Anti-pAbl; Anti-c-Abl, Anti-Parkin were purchased from Cell Signaling Technologies.

Anti-GST; Anti-FLAG; Anti-HA, Anti-Myc were purchased from Sigma.

Recombinant His-Abl was purchased from Upstate technologies.

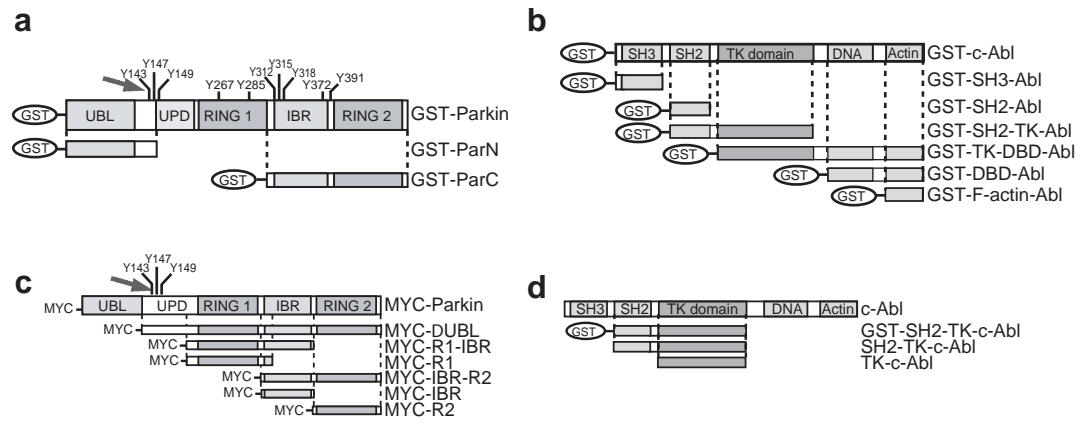

Supplemental Fig. 1

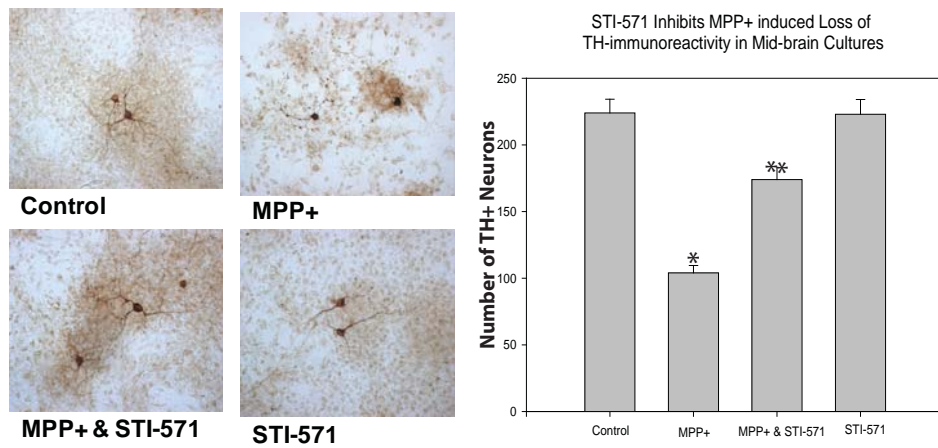

Supplemental Fig. 2

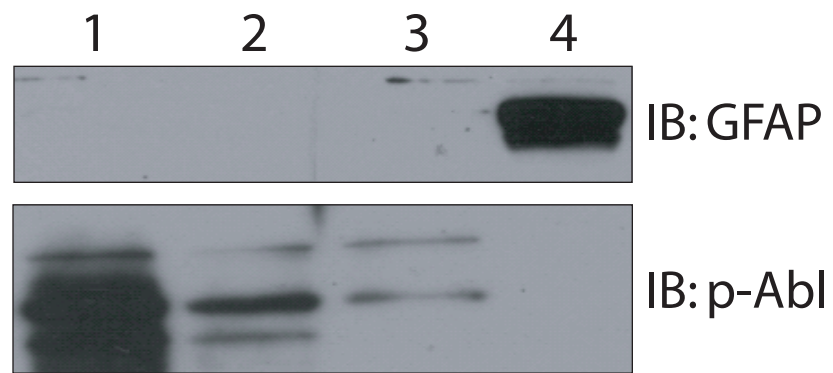

Supplemental Fig. 3
